# Supplementary material
Source: PubMed Central journal article supplement (PMC3947551)
Supplement: NIHMS545046-supplement-Supplemental_Data_File__doc__pdf__etc__.pdf [file NIHMS545046-supplement-Supplemental_Data_File__doc__pdf__etc__.pdf]

Supplemental Table 1: Correlations between Variables in the Multivariable Logistic Regression Model

| Variables                | 1    | 2    | 3    | 4    | 5    | 6    | 7     | 8    | 9    | 10   | 11   | 12   | 13  |
|--------------------------|------|------|------|------|------|------|-------|------|------|------|------|------|-----|
| 1. Marital status        | --   |      |      |      |      |      |       |      |      |      |      |      |     |
| 2. Health rating         | -.06 | --   |      |      |      |      |       |      |      |      |      |      |     |
| 3. Place admitted from   | .01  | -.07 | --   |      |      |      |       |      |      |      |      |      |     |
| 4. Facility size         | .05  | .06  | -.05 | --   |      |      |       |      |      |      |      |      |     |
| 5. For profit status     | -.02 | .06  | -.05 | .12  | --   |      |       |      |      |      |      |      |     |
| 6. Bathroom in room      | -.07 | -.04 | .10  | -.50 | -.15 | --   |       |      |      |      |      |      |     |
| 7. Depression            | -.02 | .07  | -.04 | .08  | .03  | -.08 | --    |      |      |      |      |      |     |
| 8. Stroke                | -.05 | .09  | -.04 | .01  | .02  | .02  | .05   | --   |      |      |      |      |     |
| 9. Bowel incontinence    | -.07 | .26  | -.03 | .19  | .15  | -.12 | .05   | .08  | --   |      |      |      |     |
| 10. Bladder incontinence | -.06 | .25  | -.02 | .14  | .11  | -.01 | .07   | .08  | .58  | --   |      |      |     |
| 11. Physical impairments | -.07 | .32  | -.01 | -.03 | -.01 | .11  | .03   | .11  | .24  | .27  | --   |      |     |
| 12. Visual impairments   | -.01 | -.08 | .01  | -.03 | -.02 | <.01 | -.01  | -.01 | -.08 | -.08 | -.11 | --   |     |
| 13. Hearing impairment   | .01  | .11  | .05  | -.05 | -.06 | .10  | -.03  | .02  | .05  | .09  | .21  | -.15 | --  |
| 14. Cane/Walker          | -.01 | .06  | .02  | -.11 | -.09 | .17  | <-.01 | .05  | -.07 | .01  | .28  | -.06 | .17 |

| Variables                    | 1    | 2    | 3    | 4     | 5     | 6    | 7    | 8    | 9    | 10  | 11  | 12   | 13   |
|------------------------------|------|------|------|-------|-------|------|------|------|------|-----|-----|------|------|
| 15. Assistance walking       | -.01 | .19  | -.02 | <-.01 | <-.01 | .08  | -.01 | .11  | .15  | .20 | .33 | -.07 | .18  |
| 16. Assistance going outside | .01  | <.01 | .02  | <-.01 | -.04  | .05  | .01  | .02  | -.01 | .06 | .12 | -.03 | .07  |
| 17. Bathing                  | -.01 | .24  | -.02 | .07   | .09   | .02  | .01  | .07  | .28  | .36 | .35 | -.07 | .12  |
| 18. Dressing                 | -.06 | .29  | -.02 | .11   | .14   | -.03 | .01  | .09  | .40  | .46 | .33 | -.08 | .11  |
| 19. Transferring             | -.05 | .17  | -.03 | .10   | .07   | -.03 | .01  | .07  | .23  | .25 | .19 | -.07 | .09  |
| 20. IADLs                    | .08  | .03  | -.02 | .12   | -.01  | -.09 | .07  | <.01 | -.03 | .05 | .06 | -.05 | <.01 |

Supplemental Table 1

*Continued*

| Variables                    | 14  | 15   | 16  | 17  | 18  | 19  | 20 |
|------------------------------|-----|------|-----|-----|-----|-----|----|
| 14. Cane/Walker              | --  |      |     |     |     |     |    |
| 15. Assistance walking       | .51 | --   |     |     |     |     |    |
| 16. Assistance going outside | .27 | .37  | --  |     |     |     |    |
| 17. Bathing                  | .14 | .27  | .21 | --  |     |     |    |
| 18. Dressing                 | .04 | .26  | .14 | .58 | --  |     |    |
| 19. Transferring             | .14 | .36  | .22 | .22 | .34 | --  |    |
| 20. IADLs                    | .04 | <.01 | .23 | .17 | .10 | .02 | -- |
